# Supplementary material for: Predictors of change in asthma-related quality of life: a longitudinal real-life study in adult asthmatics
Source: Springer Nature journal article supplement (doi:10.1007/s11136-022-03339-0), 2023-01-03
Supplement: MOESM1 [file 23888146]

**Supplementary Table 1 (S1). Univariate beta regression mixed models on AQLQ and its dimensions based on independent variables individually, with time and treatment changes group as fixed effect**

**S1.1 Effect of ACT on AQLQ and its dimensions**

| Parameters                    | Global AQLQ             |         | AQLQ Symptom            |         | AQLQ Activity           |         | AQLQ Emotional          |         | AQLQ Environmental      |         |
|-------------------------------|-------------------------|---------|-------------------------|---------|-------------------------|---------|-------------------------|---------|-------------------------|---------|
|                               | Estimate<br>(std.error) | P-value | Estimate<br>(std.error) | P-value | Estimate<br>(std.error) | P-value | Estimate<br>(std.error) | P-value | Estimate<br>(std.error) | P-value |
| ACT                           | <b>0.19(0.01)</b>       | <0.0001 | <b>0.21(0.01)</b>       | <0.0001 | <b>0.21(0.01)</b>       | <0.001  | <b>0.21(0.01)</b>       | <0.0001 | <b>0.12(0.01)</b>       | <0.0001 |
| Time                          | -0.05(0.06)             | 0.32    | 0.07(0.06)              | 0.24    | -0.11(0.07)             | 0.11    | 0.001(0.08)             | 0.99    | -<br>0.23(0.08)         | 0.008   |
| No change                     | Reference               |         |                         |         |                         |         |                         |         |                         |         |
| No treatment to SABA          | 0.42(0.31)              | 0.16    | 0.23(0.32)              | 0.46    | 0.13(0.38)              | 0.72    | 0.60(0.48)              | 0.21    | 0.95(0.57)              | 0.10    |
| No treatment, SABAtoICS/LABA  | -0.08(0.09)             | 0.39    | -0.05(0.1)              | 0.61    | -0.23(0.12)             | 0.07    | -0.12(0.16)             | 0.46    | 0.02(0.19)              | 0.91    |
| Treated or not treated to OCS | 0.17(0.30)              | 0.56    | 0.08(0.31)              | 0.81    | -0.45(0.37)             | 0.22    | 0.39(0.48)              | 0.54    | 0.95(0.58)              | 0.09    |
| Step down ICS/LTRA            | -0.13(0.12)             | 0.30    | -0.11(0.13)             | 0.37    | -0.12(0.16)             | 0.45    | -0.08(0.21)             | 0.66    | -<br>0.25(0.24)         | 0.29    |
| Stop OCS                      | -0.09(0.13)             | 0.48    | 0.03(0.14)              | 0.81    | -0.43(0.16)             | 0.009   | -0.19(0.21)             | 0.37    | 0.13(0.25)              | 0.61    |

**S1.2 Effect of age on AQLQ and its dimensions**

| Parameters                    | Global AQLQ          |         | AQLQ Symptom         |         | AQLQ Activity        |         | AQLQ Emotional       |         | AQLQ Environmental   |         |
|-------------------------------|----------------------|---------|----------------------|---------|----------------------|---------|----------------------|---------|----------------------|---------|
|                               | Estimate (std.error) | P-value | Estimate (std.error) | P-value | Estimate (std.error) | P-value | Estimate (std.error) | P-value | Estimate (std.error) | P-value |
| Age (Year)                    | 0.004(0.004)         | 0.364   | 0.01(0.004)          | 0.09    | -0.003(0.005)        | 0.62    | 0.004(0.006)         | 0.47    | 0.007(0.005)         | 0.19    |
| Time                          | 0.52(0.07)           | <0.0001 | 0.68(0.09)           | <0.0001 | 0.52(0.09)           | <0.001  | 0.63(0.09)           | <0.001  | 0.13(0.08)           | 0.13    |
| No change                     | Reference            |         |                      |         |                      |         |                      |         |                      |         |
| No treatment to SABA          | 0.99(0.58)           | 0.08    | 0.78(0.58)           | 0.18    | 0.85(0.66)           | 0.19    | 1.22(0.74)           | 0.09    | 1.23(0.69)           | 0.07    |
| No treatment, SABAtoICS/LABA  | 0.06(0.19)           | 0.75    | -0.03(0.19)          | 0.86    | -0.21(0.22)          | 0.33    | -0.09(0.24)          | 0.69    | 0.04(0.23)           | 0.87    |
| Treated or not treated to OCS | -0.28(0.58)          | 0.62    | -0.43(0.57)          | 0.45    | -0.92(0.66)          | 0.16    | -0.21(0.73)          | 0.78    | 0.63(0.69)           | 0.35    |
| Step down ICS/LTRA            | -0.01(0.24)          | 0.98    | 0.01(0.24)           | 0.95    | -0.01(0.28)          | 0.96    | 0.04(0.30)           | 0.89    | -0.16(0.28)          | 0.57    |
| Stop OCS                      | -0.75(0.25)          | 0.002   | -0.67(0.25)          | 0.007   | -1.14(0.28)          | <0.0001 | -0.90(0.32)          | 0.004   | -0.29(0.31)          | 0.33    |

**S1.3 Effect of sex on AQLQ and its dimensions**

| Parameters                    | Global AQLQ             |         | AQLQ Symptom            |         | AQLQ Activity           |         | AQLQ Emotional          |         | AQLQ Environmental      |         |
|-------------------------------|-------------------------|---------|-------------------------|---------|-------------------------|---------|-------------------------|---------|-------------------------|---------|
|                               | Estimate<br>(std.error) | P-value | Estimate<br>(std.error) | P-value | Estimate<br>(std.error) | P-value | Estimate<br>(std.error) | P-value | Estimate<br>(std.error) | P-value |
| Sex (Female)                  | <b>-0.34(0.15)</b>      | 0.025   | -0.23(0.15)             | 0.133   | <b>-0.37(0.17)</b>      | 0.03    | -0.31(0.19)             | 0.11    | <b>-0.49(0.18)</b>      | 0.007   |
| Time                          | 0.53(0.07)              | <0.0001 | 0.69(0.08)              | <0.001  | 0.51(0.08)              | <0.001  | 0.63(0.09)              | <0.0001 | 0.13(0.08)              | 0.11    |
| No change                     | Reference               |         |                         |         |                         |         |                         |         |                         |         |
| No treatment to SABA          | 1.10(0.57)              | 0.05    | 0.92(0.57)              | 0.11    | 0.86(0.65)              | 0.19    | 1.32(0.73)              | 0.07    | 1.41(0.68)              | 0.04    |
| No treatment, SABAtOCS/LABA   | -0.08(0.19)             | 0.67    | -0.05(0.19)             | 0.79    | -0.23(0.22)             | 0.29    | 0.11(0.24)              | 0.63    | 0.01(0.22)              | 0.96    |
| Treated or not treated to OCS | -0.28(0.57)             | 0.62    | -0.40(0.57)             | 0.48    | -0.96(0.65)             | 0.14    | -0.20(0.73)             | 0.77    | 0.64(0.68)              | 0.35    |
| Step down ICS/LTRA            | 0.01(0.24)              | 0.94    | 0.01(0.24)              | 0.95    | 0.03(0.27)              | 0.91    | 0.06(0.30)              | 0.85    | -0.14(0.28)             | 0.63    |
| Stop OCS                      | -0.81(0.25)             | 0.001   | -0.71(0.25)             | 0.005   | -1.22(0.28)             | <0.001  | -0.96(0.32)             | 0.002   | -0.38(0.3)              | 0.19    |

**S1.4 Effect of BMI on AQLQ and its dimensions**

| Parameters                    | Global AQLQ          |         | AQLQ Symptom         |         | AQLQ Activity        |         | AQLQ Emotional       |         | AQLQ Environmental   |         |
|-------------------------------|----------------------|---------|----------------------|---------|----------------------|---------|----------------------|---------|----------------------|---------|
|                               | Estimate (std.error) | P-value | Estimate (std.error) | p-value | Estimate (std.error) | p-value | Estimate (std.error) | P-value | Estimate (std.error) | p-value |
| BMI (kg/m <sup>2</sup> )      | <b>-0.04(0.01)</b>   | 0.003   | <b>-0.04(0.08)</b>   | 0.01    | <b>-0.07(0.02)</b>   | <0.001  | -0.02(0.02)          | 0.24    | <b>-0.04(0.02)</b>   | 0.03    |
| Time                          | 0.53(0.07)           | <0.001  | 0.91(0.57)           | <0.001  | 0.52(0.09)           | <0.001  | 0.64(0.09)           | <0.001  | 0.14(0.08)           | 0.10    |
| No change                     | Reference            |         |                      |         |                      |         |                      |         |                      |         |
| No treatment to SABA          | 1.08(0.57)           | 0.06    | 0.91(0.57)           | 0.11    | 0.85(0.63)           | 0.18    | 1.29(0.73)           | 0.07    | 1.36(0.69)           | 0.05    |
| No treatment, SABAtoICS/LABA  | -0.02(0.19)          | 0.91    | -0.001(0.19)         | 0.99    | -0.14(0.21)          | 0.49    | -0.08(0.24)          | 0.75    | 0.07(0.23)           | 0.77    |
| Treated or not treated to OCS | -0.23(0.57)          | 0.69    | -0.36(0.57)          | 0.53    | -0.88(0.63)          | 0.16    | -0.16(0.73)          | 0.82    | 0.71(0.69)           | 0.30    |
| Step down ICS/LTRA            | -0.04(0.24)          | 0.86    | -0.03(0.24)          | 0.91    | -0.04(0.26)          | 0.87    | 0.02(0.30)           | 0.95    | -0.21(0.29)          | 0.47    |
| Stop OCS                      | -0.66(0.25)          | 0.008   | -0.58(0.25)          | 0.02    | -1.0(0.27)           | 0.003   | -0.85(0.32)          | 0.007   | -0.21(0.30)          | 0.49    |

**S1.5 Effect of smoking status on AQLQ and its dimensions**

| Parameters                    | Global AQLQ          |         | AQLQ Symptom         |         | AQLQ Activity        |         | AQLQ Emotional       |         | AQLQ Environmental   |         |
|-------------------------------|----------------------|---------|----------------------|---------|----------------------|---------|----------------------|---------|----------------------|---------|
|                               | Estimate (std.error) | P-value | Estimate (std.error) | P-value | Estimate (std.error) | P-value | Estimate (std.error) | P-value | Estimate (std.error) | P-value |
| Non-smokers                   | Reference            |         |                      |         |                      |         |                      |         |                      |         |
| Ex-Smokers                    | 0.16(0.14)           | 0.28    | 0.18(0.15)           | 0.23    | 0.02(0.17)           | 0.92    | 0.09(0.19)           | 0.61    | <b>0.34(0.17)</b>    | 0.06    |
| Current Smokers               | -0.01(0.20)          | 0.97    | -0.27(0.21)          | 0.19    | -0.01(0.23)          | 0.97    | -0.33(0.25)          | 0.19    | <b>0.64(0.24)</b>    | 0.007   |
| Time                          | 0.52(0.07)           | <0.0001 | -0.26(0.21)          | <0.001  | 0.52(0.08)           | <0.0001 | 0.64(0.09)           | <0.0001 | 0.14(0.08)           | 0.08    |
| No change                     | Reference            |         |                      |         |                      |         |                      |         |                      |         |
| No treatment to SABA          | 0.99(0.57)           | 0.08    | 0.68(0.09)           | 0.13    | 0.81(0.66)           | 0.22    | 1.29(0.73)           | 0.08    | 1.18(0.68)           | 0.08    |
| No treatment, SABAtOICS/LABA  | -0.07(0.19)          | 0.69    | 0.86(0.57)           | 0.91    | -0.19(0.22)          | 0.37    | -0.07(0.24)          | 0.76    | 0.001(0.23)          | 0.99    |
| Treated or not treated to OCS | -0.29(0.58)          | 0.61    | -0.02(0.19)          | 0.49    | 0.94(0.66)           | 0.15    | -0.16(0.73)          | 0.83    | 0.58(0.68)           | 0.39    |
| Step down ICS/LTRA            | -0.03(0.24)          | 0.87    | -0.38(0.57)          | 0.94    | -0.005(0.27)         | 0.98    | 0.02(0.30)           | 0.94    | -0.17(0.28)          | 0.54    |
| Stop OCS                      | -0.78(0.25)          | 0.001   | -0.66(0.25)          | 0.008   | -1.16(0.29)          | <0.0001 | -0.88(0.32)          | 0.006   | -0.36(0.29)          | 0.22    |

**S1.6 Effect of atopy  
on AQLQ and its  
dimensions**

| Parameters                    | Global AQLQ             |         | AQLQ Symptom            |         | AQLQ Activity           |         | AQLQ Emotional          |         | AQLQ Environmental      |         |
|-------------------------------|-------------------------|---------|-------------------------|---------|-------------------------|---------|-------------------------|---------|-------------------------|---------|
|                               | Estimate<br>(std.error) | P-value | Estimate<br>(std.error) | P-value | Estimate<br>(std.error) | P-value | Estimate<br>(std.error) | P-value | Estimate<br>(std.error) | P-value |
| Atopy (Yes)                   | 0.02(0.15)              | 0.86    | 0.12(0.15)              | 0.41    | 0.10(0.17)              | 0.55    | -0.09(0.19)             | 0.61    | -0.17(0.18)             | 0.35    |
| Time                          | 0.51(0.07)              | <0.0001 | 0.68(0.08)              | <0.0001 | 0.48(0.09)              | <0.0001 | 0.60(0.10)              | <0.0001 | 0.12(0.08)              | 0.5     |
| No change                     | Reference               |         |                         |         |                         |         |                         |         |                         |         |
| No treatment to SABA          | 1.19(0.57)              | 0.03    | 1.09(0.57)              | 0.06    | 0.91(0.65)              | 0.1     | 1.41(0.73)              | 0.06    | 1.41(0.69)              | 0.04    |
| No treatment, SABAtOICS/LABA  | 0.12(0.19)              | 0.54    | 0.15(0.19)              | 0.43    | 0.08(0.22)              | 0.74    | 0.12(0.25)              | 0.62    | 0.21(0.24)              | 0.37    |
| Treated or not treated to OCS | -0.13(0.57)             | 0.82    | -0.23(0.57)             | 0.68    | -0.87(0.65)             | 0.18    | -0.01(0.73)             | 0.98    | 0.81(0.69)              | 0.24    |
| Step down ICS/LTRA            | 0.01(0.25)              | 0.97    | 0.06(0.25)              | 0.1     | -0.03(0.29)             | 0.91    | 0.08(0.32)              | 0.81    | -0.17(0.30)             | 0.58    |
| Stop OCS                      | -0.72(0.26)             | 0.006   | -0.59(0.26)             | 0.02    | -1.15(0.31)             | 0.003   | -0.89(0.33)             | 0.007   | -0.33(0.32)             | 0.30    |

**S1.7 Effect of onset of asthma on AQLQ and its dimensions**

| Parameters                    | Global AQLQ          |         | AQLQ Symptom         |         | AQLQ Activity        |         | AQLQ Emotional       |         | AQLQ Environmental   |         |
|-------------------------------|----------------------|---------|----------------------|---------|----------------------|---------|----------------------|---------|----------------------|---------|
|                               | Estimate (std.error) | P-value | Estimate (std.error) | P-value | Estimate (std.error) | P-value | Estimate (std.error) | P-value | Estimate (std.error) | P-value |
| Onset of asthma               | <b>0.07(0.003)</b>   | 0.036   | 0.01(0003)           | 0.184   | 0.004(0.004)         | 0.27    | <b>0.01(0.004)</b>   | 0.02    | <b>0.01(0.004)</b>   | 0.009   |
| Time                          | 0.38(0.09)           | <0.0001 | 0.49(0.12)           | <0.0001 | 0.41(0.11)           | 0.0001  | 0.50(0.13)           | <0.0001 | 0.04(0.11)           | 0.74    |
| No change                     | Reference            |         |                      |         |                      |         |                      |         |                      |         |
| No treatment to SABA          | 1.86(0.72)           | 0.009   | 1.79(0.71)           | 0.01    | 1.67(0.85)           | 0.05    | 2.39(0.95)           | 0.01    | 1.71(0.91)           | 0.06    |
| No treatment, SABAtOICS/LABA  | -0.03(0.21)          | 0.87    | 0.09(0.21)           | 0.63    | -0.19(0.25)          | 0.44    | -0.10(0.27)          | 0.71    | -0.01(0.26)          | 0.97    |
| Treated or not treated to OCS | -0.93(0.65)          | 0.15    | -0.79(0.66)          | 0.23    | -1.91(0.77)          | 0.01    | -1.13(0.86)          | 0.19    | 0.27(0.82)           | 0.74    |
| Step down ICS/LTRA            | 0.09(0.25)           | 0.69    | 0.21(0.25)           | 0.41    | 0.04(0.30)           | 0.88    | 0.26(0.33)           | 0.44    | -0.15(0.32)          | 0.64    |
| Stop OCS                      | -0.72(0.29)          | 0.01    | -0.68(0.29)          | 0.02    | -1.09(0.34)          | 0.001   | -0.83(0.37)          | 0.03    | -0.19(0.36)          | 0.58    |

**S1.8 Effect of FeNO on AQLQ and its dimensions**

| Parameters                    | Global AQLQ          |         | AQLQ Symptom         |         | AQLQ Activity        |         | AQLQ Emotional       |         | AQLQ Environmental   |         |
|-------------------------------|----------------------|---------|----------------------|---------|----------------------|---------|----------------------|---------|----------------------|---------|
|                               | Estimate (std.error) | P-value | Estimate (std.error) | p-value | Estimate (std.error) | P-value | Estimate (std.error) | p-value | Estimate (std.error) | p-value |
| FENO (ppb)                    | -0.001(0.001)        | 0.59    | -0.002(0.001)        | 0.12    | 0.001(0.002)         | 0.35    | -0.001(0.002)        | 0.41    | 0.001(0.01)          | 0.56    |
| Time                          | 0.55(0.07)           | <0.0001 | 0.69(0.09)           | <0.001  | 0.57(0.08)           | <0.0001 | 0.64(0.1)            | <0.001  | 0.17(0.09)           | 0.04    |
| No change                     | Reference            |         |                      |         |                      |         |                      |         |                      |         |
| No treatment to SABA          | 1.03(0.58)           | 0.07    | 0.86(0.58)           | 0.14    | 0.79(0.65)           | 0.22    | 1.26(0.73)           | 0.08    | 1.32(0.69)           | 0.06    |
| No treatment, SABAtOICS/LABA  | -0.06(0.19)          | 0.76    | -0.01(0.19)          | 0.97    | -0.24(0.22)          | 0.27    | -0.07(0.24)          | 0.75    | 0.01(0.23)           | 0.96    |
| Treated or not treated to OCS | -0.28(0.58)          | 0.62    | -0.41(0.58)          | 0.48    | -0.96(0.65)          | 0.14    | -0.19(0.73)          | 0.79    | 0.65(0.69)           | 0.35    |
| Step down ICS/LTRA            | -0.05(0.24)          | 0.85    | -0.02(0.24)          | 0.94    | -0.06(0.27)          | 0.83    | 0.01(0.31)           | 0.97    | -0.23(0.28)          | 0.42    |
| Stop OCS                      | -0.77(0.25)          | 0.002   | -0.67(0.25)          | 0.007   | -1.21(0.28)          | <0.0001 | -0.91(0.32)          | 0.004   | -0.32(0.30)          | 0.28    |

**S1.9 Effect of sputum neutrophils on AQLQ and its dimensions**

| Parameters                              | Global AQLQ          |         | AQLQ Symptom         |         | AQLQ Activity        |         | AQLQ Emotional       |         | AQLQ Environmental   |         |
|-----------------------------------------|----------------------|---------|----------------------|---------|----------------------|---------|----------------------|---------|----------------------|---------|
|                                         | Estimate (std.error) | P-value | Estimate (std.error) | P-value | Estimate (std.error) | P-value | Estimate (std.error) | P-value | Estimate (std.error) | P-value |
| Sputum neutrophils (10 <sup>3</sup> /g) | 0.001(0.002)         | 0.48    | 0.002(0.002)         | 0.30    | -0.01(0.02)          | 0.72    | 0.003(0.002)         | 0.24    | -0.001(0.002)        | 0.96    |
| Time                                    | 0.53(0.08)           | <0.0001 | 0.66(0.09)           | <0.001  | 0.55(0.11)           | <0.001  | 0.65(0.11)           | <0.0001 | 0.18(0.09)           | 0.06    |
| No change                               | Reference            |         |                      |         |                      |         |                      |         |                      |         |
| No treatment to SABA                    | 1.11(0.67)           | 0.09    | 0.71(0.67)           | 0.29    | 1.11(0.75)           | 0.14    | 1.49(0.84)           | 0.08    | 1.25(0.81)           | 0.12    |
| No treatment, SABA to ICS/LABA          | -0.07(0.21)          | 0.73    | 0.03(0.21)           | 0.89    | -0.30(0.24)          | 0.19    | -0.14(0.26)          | 0.61    | -0.05(0.25)          | 0.84    |
| Treated or not treated to OCS           | -0.09(0.6)           | 0.88    | -0.11(0.60)          | 0.84    | -0.79(0.68)          | 0.24    | -0.06(0.76)          | 0.93    | 0.73(0.72)           | 0.31    |
| Step down ICS/LTRA                      | -0.002(0.26)         | 0.99    | 0.06(0.26)           | 0.82    | -0.09(0.29)          | 0.75    | 0.07(0.33)           | 0.94    | -0.25(0.31)          | 0.42    |
| Stop OCS                                | -0.68(0.28)          | 0.01    | -0.58(0.28)          | 0.04    | -1.21(0.31)          | 0.0001  | -0.91(0.35)          | 0.009   | -0.11(0.34)          | 0.75    |

**S1.10 Effect of sputum eosinophils on AQLQ and its dimensions**

| Parameters                              | Global AQLQ          |         | AQLQ Symptom         |         | AQLQ Activity        |         | AQLQ Emotional       |         | AQLQ Environmental   |         |
|-----------------------------------------|----------------------|---------|----------------------|---------|----------------------|---------|----------------------|---------|----------------------|---------|
|                                         | Estimate (std.error) | P-value | Estimate (std.error) | P-value | Estimate (std.error) | P-value | Estimate (std.error) | p-value | Estimate (std.error) | P-value |
| Sputum eosinophils (10 <sup>3</sup> /g) | <b>-0.01(0.002)</b>  | 0.0001  | <b>-0.01(0.004)</b>  | <0.001  | <b>-0.01(0.003)</b>  | 0.009   | <b>-0.01(0.004)</b>  | <0.001  | -0.01(0.003)         | 0.06    |
| Time                                    | 0.47(0.08)           | <0.0001 | 0.59(0.09)           | <0.001  | 0.48(0.11)           | <0.0001 | 0.59(0.11)           | <0.001  | 0.13(0.09)           | 0.16    |
| No change                               | Reference            |         |                      |         |                      |         |                      |         |                      |         |
| No treatment to SABA                    | 1.01(0.66)           | <0.0001 | 0.62(0.67)           | 0.35    | 1.01(0.75)           | 0.18    | 1.41(0.83)           | 0.09    | 1.18(0.81)           | 0.14    |
| No treatment, SABAtOICS/LABA            | -0.05(0.21)          | 0.13    | 0.06(0.21)           | 0.77    | -0.26(0.24)          | 0.26    | -0.11(0.26)          | 0.68    | -0.03(0.25)          | 0.91    |
| Treated or not treated to OCS           | -0.06(0.59)          | 0.81    | -0.07(0.59)          | 0.90    | -0.77(0.67)          | 0.25    | -0.01(0.75)          | 0.98    | 0.75(0.72)           | 0.30    |
| Step down ICS/LTRA                      | -0.05(0.26)          | 0.91    | 0.02(0.26)           | 0.94    | -0.12(0.29)          | 0.68    | 0.02(0.32)           | 0.95    | -0.27(0.31)          | 0.38    |
| Stop OCS                                | -0.67(0.27)          | 0.85    | -0.56(0.28)          | 0.04    | -1.19(0.31)          | 0.0001  | -0.89(0.34)          | 0.01    | -0.10(0.33)          | 0.76    |

**S1.11 Effect of blood neutrophils on AQLQ and its dimensions**

| Parameters                    | Global AQLQ          |         | AQLQ Symptom         |         | AQLQ Activity        |         | AQLQ Emotional       |         | AQLQ Environmental   |         |
|-------------------------------|----------------------|---------|----------------------|---------|----------------------|---------|----------------------|---------|----------------------|---------|
|                               | Estimate (std.error) | P-value | Estimate (std.error) | P-value | Estimate (std.error) | P-value | Estimate (std.error) | P-value | Estimate (std.error) | P-value |
| Blood neutrophils (µL)        | 0.005(0.005)         | 0.31    | 0.003(0.006)         | 0.64    | 0.002(0.006)         | 0.71    | 0.005(0.007)         | 0.45    | 0.009(0.006)         | 0.17    |
| Time                          | 0.53(0.07)           | <0.0001 | 0.68(0.09)           | <0.0001 | 0.52(0.08)           | <0.0001 | 0.64(0.09)           | <0.0001 | 0.14(0.08)           | 0.09    |
| No change                     | Reference            |         |                      |         |                      |         |                      |         |                      |         |
| No treatment to SABA          | 1.04(0.58)           | 0.07    | 0.88(0.58)           | 0.13    | 0.79(0.65)           | 0.22    | 1.25(0.73)           | 0.08    | 1.33(0.69)           | 0.06    |
| No treatment, SABAtOICS/LABA  | -0.07(0.19)          | 0.71    | -0.05(0.19)          | 0.79    | -0.22(0.22)          | 0.31    | -0.12(0.25)          | 0.63    | 0.03(0.23)           | 0.87    |
| Treated or not treated to OCS | -0.33(0.58)          | 0.57    | -0.42(0.58)          | 0.47    | -0.98(0.65)          | 0.13    | -0.27(0.74)          | 0.72    | 0.58(0.69)           | 0.40    |
| Step down ICS/LTRA            | -0.03(0.24)          | 0.88    | -0.01(0.24)          | 0.95    | -0.03(0.27)          | 0.89    | -0.005(0.31)         | 0.98    | -0.18(0.29)          | 0.52    |
| Stop OCS                      | -0.74(0.25)          | 0.003   | -0.65(0.25)          | 0.009   | -1.14(0.28)          | <0.0001 | -0.91(0.32)          | 0.004   | -0.25(0.31)          | 0.39    |

**S1.12 Effect of blood eosinophils on AQLQ and its dimensions**

| Parameters                    | Global AQLQ          |         | AQLQ Symptom         |         | AQLQ Activity        |         | AQLQ Emotional       |         | AQLQ Environmental   |         |
|-------------------------------|----------------------|---------|----------------------|---------|----------------------|---------|----------------------|---------|----------------------|---------|
|                               | Estimate (std.error) | P-value | Estimate (std.error) | P-value | Estimate (std.error) | P-value | Estimate (std.error) | P-value | Estimate (std.error) | P-value |
| Blood eosinophils (µL)        | <b>-0.06(0.01)</b>   | <0.0001 | <b>-0.07(0.01)</b>   | <0.0001 | <b>-0.07(0.02)</b>   | <0.0001 | <b>-0.07(0.02)</b>   | <0.0001 | <b>-0.03(0.02)</b>   | 0.04    |
| Time                          | 0.49(0.07)           | <0.0001 | 0.63(0.08)           | <0.0001 | 0.47(0.09)           | <0.0001 | 0.59(0.09)           | <0.001  | 0.13(0.08)           | 0.14    |
| No change                     | Reference            |         |                      |         |                      |         |                      |         |                      |         |
| No treatment to SABA          | 0.99(0.58)           | 0.08    | 0.84(0.57)           | 0.15    | 0.74(0.65)           | 0.26    | 1.20(0.73)           | 0.10    | 1.31(0.69)           | 0.06    |
| No treatment, SABAtOICS/LABA  | -0.04(0.19)          | 0.85    | -0.01(0.19)          | 0.96    | -0.18(0.22)          | 0.41    | 0.08(0.24)           | 0.75    | 0.04(0.23)           | 0.85    |
| Treated or not treated to OCS | -0.31(0.58)          | 0.59    | -0.42(0.57)          | 0.46    | -0.99(0.65)          | 0.13    | -0.25(0.73)          | 0.73    | 0.65(0.69)           | 0.34    |
| Step down ICS/LTRA            | -0.07(0.24)          | 0.77    | -0.05(0.24)          | 0.82    | -0.08(0.27)          | 0.77    | -0.04(0.31)          | 0.88    | -0.19(0.29)          | 0.51    |
| Stop OCS                      | -0.73(0.25)          | 0.003   | -0.64(0.25)          | 0.01    | -1.14(0.28)          | <0.0001 | -0.89(0.32)          | 0.005   | -0.25(0.30)          | 0.41    |

**S1.13**  
**Effect of**  
**total IgE**  
**on AQLQ**  
**and its**  
**dimensions**

| Parameters           | Global AQLQ             |         | AQLQ Symptom            |         | AQLQ Activity           |         | AQLQ Emotional          |         | AQLQ Environmental      |         |
|----------------------|-------------------------|---------|-------------------------|---------|-------------------------|---------|-------------------------|---------|-------------------------|---------|
|                      | Estimate<br>(std.error) | P-value | Estimate<br>(std.error) | P-value | Estimate<br>(std.error) | P-value | Estimate<br>(std.error) | P-value | Estimate<br>(std.error) | P-value |
| Total IgE (KU/L)     | 0.0001(0.0001)          | 0.49    | 0.0001(0.0001)          | 0.198   | 0.0001(0.0001)          | 0.96    | 0.0001(0.0001)          | 0.75    | 0.0001(0.0001)          | 0.19    |
| Time                 | 0.52(0.08)              | <0.0001 | 0.68(0.09)              | <0.001  | 0.51(0.09)              | <0.0001 | 0.61(0.11)              | <0.0001 | 0.12(0.09)              | 0.15    |
| No change            | Reference               |         |                         |         |                         |         |                         |         |                         |         |
| No treatment to SABA | 1.07(0.56)              | 0.06    | 0.93(0.56)              | 0.09    | 0.82(0.65)              | 0.21    | 1.29(0.73)              | 0.08    | 1.34(0.68)              | 0.04    |
| No treatment to ICS  | -0.01(0.19)             | 0.93    | 0.01(0.19)              | 0.94    | -0.15(0.23)             | 0.50    | -0.04(0.26)             | 0.86    | 0.04(0.24)              | 0.85    |
| Treated to OCS       | -0.25(0.56)             | 0.66    | -0.36(0.56)             | 0.53    | -0.92(0.65)             | 0.16    | -0.17(0.73)             | 0.81    | 0.67(0.68)              | 0.33    |
| Step down ICS/LTRA   | -0.02(0.24)             | 0.93    | -0.03(0.25)             | 0.91    | -0.01(0.28)             | 0.96    | 0.04(0.32)              | 0.89    | -0.18(0.29)             | 0.53    |
| Stop OCS             | -0.77(0.26)             | 0.003   | -0.67(0.26)             | 0.009   | -1.13(0.29)             | 0.0001  | -0.91(0.33)             | 0.005   | -0.4(0.31)              | 0.19    |

**S1.14 Effect of fibrinogen on AQLQ and its dimensions**

| Parameters                    | Global AQLQ          |         | AQLQ Symptom         |         | AQLQ Activity        |         | AQLQ Emotional       |         | AQLQ Environmental   |         |
|-------------------------------|----------------------|---------|----------------------|---------|----------------------|---------|----------------------|---------|----------------------|---------|
|                               | Estimate (std.error) | P-value | Estimate (std.error) | p-value | Estimate (std.error) | P-value | Estimate (std.error) | P-value | Estimate (std.error) | P-value |
| Fibrinogen (g/l)              | <b>-0.15(0.07)</b>   | 0.03    | -0.13(0.08)          | 0.08    | <b>-0.19(0.08)</b>   | 0.02    | -0.11(0.09)          | 0.22    | -0.06(0.08)          | 0.41    |
| Time                          | 0.55(0.07)           | <0.001  | 0.70(0.09)           | <0.001  | 0.59(0.09)           | <0.0001 | 0.66(0.10)           | <0.0001 | 0.16(0.09)           | 0.06    |
| No change                     | Reference            |         |                      |         |                      |         |                      |         |                      |         |
| No treatment to SABA          | 1.02(0.58)           | 0.08    | 0.91(0.58)           | 0.12    | 0.73(0.65)           | 0.26    | 1.27(0.74)           | 0.08    | 1.29(0.69)           | 0.06    |
| No treatment, SABAtOICS/LABA  | -0.03(0.20)          | 0.88    | 0.04(0.20)           | 0.86    | -0.19(0.23)          | 0.38    | -0.04(0.26)          | 0.86    | 0.01(0.24)           | 0.98    |
| Treated or not treated to OCS | -0.17(0.59)          | 0.77    | -0.26(0.59)          | 0.66    | -0.79(0.66)          | 0.23    | -0.12(0.75)          | 0.87    | 0.68(0.71)           | 0.33    |
| Step down ICS/LTRA            | 0.04(0.25)           | 0.86    | 0.12(0.25)           | 0.63    | -0.001(0.28)         | 0.99    | 0.13(0.32)           | 0.68    | -0.21(0.30)          | 0.48    |
| Stop OCS                      | -0.75(0.26)          | 0.004   | -0.60(0.26)          | 0.02    | -1.15(0.29)          | 0.001   | -0.91(0.33)          | 0.006   | -0.40(0.31)          | 0.20    |

**S1.15 Effect of FEV1 pre (%) on AQLQ and its dimensions**

| Parameters                    | Global AQLQ          |         | AQLQ Symptom         |         | AQLQ Activity        |         | AQLQ Emotional       |         | AQLQ Environmental   |         |
|-------------------------------|----------------------|---------|----------------------|---------|----------------------|---------|----------------------|---------|----------------------|---------|
|                               | Estimate (std.error) | P-value | Estimate (std.error) | P-value | Estimate (std.error) | P-value | Estimate (std.error) | P-value | Estimate (std.error) | P-value |
| FEV1 pre (%)                  | <b>0.02(0.003)</b>   | <0.0001 | <b>0.02(0.003)</b>   | <0.0001 | <b>0.03(0.003)</b>   | <0.0001 | <b>0.03(0.003)</b>   | <0.0001 | <b>0.01(0.003)</b>   | <0.001  |
| Time                          | 0.45(0.06)           | <0.0001 | 0.62(0.08)           | <0.0001 | 0.43(0.08)           | <0.0001 | 0.56(0.09)           | <0.0001 | 0.09(0.08)           | 0.26    |
| No change                     | Reference            |         |                      |         |                      |         |                      |         |                      |         |
| No treatment to SABA          | 0.72(0.55)           | 0.19    | 0.58(0.56)           | 0.29    | 0.41(0.61)           | 0.50    | 0.91(0.68)           | 0.186   | 1.14(0.68)           | 0.09    |
| No treatment to ICS           | -0.009(0.18)         | 0.96    | 0.01(0.19)           | 0.95    | -0.14(0.20)          | 0.50    | -0.03(0.23)          | 0.876   | 0.07(0.22)           | 0.75    |
| Treated or not treated to OCS | 0.03(0.55)           | 0.95    | -0.12(0.56)          | 0.83    | -0.56(0.61)          | 0.35    | 0.15(0.69)           | 0.827   | 0.86(0.68)           | 0.20    |
| Step down ICS/LTRA            | -0.04(0.23)          | 0.85    | -0.03(0.23)          | 0.90    | -0.02(0.25)          | 0.92    | 0.004(0.29)          | 0.99    | -0.19(0.28)          | 0.49    |
| Stop OCS                      | -0.53(0.24)          | 0.02    | -0.46(0.25)          | 0.06    | -0.87(0.27)          | 0.001   | -0.65(0.30)          | 0.03    | -0.15(0.29)          | 0.62    |

**S1.16 Effect of FEV1 post (%) on AQLQ and its dimensions**

| Parameters                    | Global AQLQ          |         | AQLQ Symptom         |         | AQLQ Activity        |         | AQLQ Emotional       |         | AQLQ Environmental   |         |
|-------------------------------|----------------------|---------|----------------------|---------|----------------------|---------|----------------------|---------|----------------------|---------|
|                               | Estimate (std.error) | P-value | Estimate (std.error) | P-value | Estimate (std.error) | P-value | Estimate (std.error) | P-value | Estimate (std.error) | P-value |
| FEV1 post (%)                 | <b>0.02(0.003)</b>   | <0.001  | <b>0.02(0.003)</b>   | <0.001  | <b>0.03(0.003)</b>   | <0.001  | <b>0.02(0.003)</b>   | <0.001  | <b>0.01(0.003)</b>   | <0.001  |
| Time                          | 0.51(0.07)           | <0.001  | 0.66(0.08)           | <0.0001 | 0.49(0.08)           | <0.001  | 0.61(0.09)           | <0.001  | 0.13(0.08)           | 0.12    |
| No change                     | Reference            |         |                      |         |                      |         |                      |         |                      |         |
| No treatment to SABA          | 0.73(0.55)           | 0.19    | 0.63(0.57)           | 0.27    | 0.41(0.62)           | 0.51    | 0.94(0.67)           | 0.18    | 1.13(0.68)           | 0.09    |
| No treatment to ICS/LABA      | 0.008(0.18)          | 0.96    | 0.02(0.19)           | 0.89    | -0.11(0.20)          | 0.59    | -0.01(0.23)          | 0.94    | 0.08(0.23)           | 0.71    |
| Treated or not treated to OCS | -0.05(0.55)          | 0.92    | -0.21(0.57)          | 0.71    | -0.66(0.62)          | 0.28    | 0.05(0.69)           | 0.94    | 0.81(0.68)           | 0.23    |
| Step down ICS/LTRA            | -0.02(0.23)          | 0.92    | -0.01(0.24)          | 0.97    | -0.01(0.26)          | 0.98    | 0.03(0.29)           | 0.92    | -0.18(0.28)          | 0.51    |
| Stop OCS                      | -0.51(0.24)          | 0.04    | -0.45(0.25)          | 0.07    | -0.83(0.27)          | 0.002   | -0.63(0.30)          | 0.04    | -0.15(0.29)          | 0.61    |

**S1.17 Effect of FVC pre (%) on AQLQ and its dimensions**

| Parameters                    | Global AQLQ          |         | AQLQ Symptom         |         | AQLQ Activity        |         | AQLQ Emotional       |         | AQLQ Environmental   |         |
|-------------------------------|----------------------|---------|----------------------|---------|----------------------|---------|----------------------|---------|----------------------|---------|
|                               | Estimate (std.error) | P-value | Estimate (std.error) | P-value | Estimate (std.error) | P-value | Estimate (std.error) | P-value | Estimate (std.error) | P-value |
| FVC pre (%)                   | <b>0.02(0.003)</b>   | <0.001  | <b>0.02(0.003)</b>   | <0.001  | <b>0.03(0.003)</b>   | <0.001  | <b>0.02(0.003)</b>   | <0.001  | <b>0.01(0.003)</b>   | <0.001  |
| Time                          | 0.52(0.06)           | <0.001  | 0.68(0.08)           | <0.0001 | 0.51(0.08)           | <0.001  | 0.63(0.09)           | <0.001  | 0.13(0.08)           | 0.12    |
| No change                     | Reference            |         |                      |         |                      |         |                      |         |                      |         |
| No treatment to SABA          | 0.85(0.56)           | 0.13    | 0.72(0.57)           | 0.20    | 0.54(0.61)           | 0.38    | 1.07 (0.7)           | 0.12    | 1.22(0.68)           | 0.07    |
| No treatment, SABAtOICS/LABA  | 0.02(0.18)           | 0.92    | 0.03(0.19)           | 0.86    | -0.09(0.20)          | 0.64    | -0.01(0.23)          | 0.96    | 0.08(0.23)           | 0.70    |
| Treated or not treated to OCS | -0.14(0.56)          | 0.80    | -0.28(0.56)          | 0.62    | -0.76(0.61)          | 0.21    | -0.05(0.70)          | 0.94    | 0.75(0.68)           | 0.27    |
| Step down ICS/LTRA            | -0.07(0.23)          | 0.76    | -0.05(0.24)          | 0.84    | -0.07(0.26)          | 0.78    | -0.02(0.29)          | 0.94    | -0.21(0.28)          | 0.45    |
| Stop OCS                      | -0.54(0.24)          | 0.02    | -0.49(0.25)          | 0.05    | -0.87(0.27)          | 0.001   | -0.69(0.31)          | 0.02    | -0.16(0.29)          | 0.59    |

**S1.18 Effect of FVC post (%) on AQLQ and its dimensions**

| Parameters                     | Global AQLQ          |         | AQLQ Symptom         |         | AQLQ Activity        |         | AQLQ Emotional       |         | AQLQ Environmental   |         |
|--------------------------------|----------------------|---------|----------------------|---------|----------------------|---------|----------------------|---------|----------------------|---------|
|                                | Estimate (std.error) | P-value | Estimate (std.error) | P-value | Estimate (std.error) | P-value | Estimate (std.error) | P-value | Estimate (std.error) | P-value |
| FVC post (%)                   | <b>0.02(0.003)</b>   | <0.001  | <b>0.02(0.003)</b>   | <0.001  | <b>0.03(0.003)</b>   | <0.0001 | <b>0.02(0.004)</b>   | <0.001  | <b>0.01(0.003)</b>   | <0.001  |
| Time                           | 0.54(0.07)           | <0.001  | 0.59(0.08)           | <0.0001 | 0.54(0.08)           | <0.0001 | 0.65(0.09)           | <0.0001 | 0.15(0.08)           | 0.06    |
| No change                      | Reference            |         |                      |         |                      |         |                      |         |                      |         |
| No treatment to SABA           | 0.82(0.56)           | 0.14    | 0.71(0.57)           | 0.21    | 0.48(0.63)           | 0.44    | 1.05(0.71)           | 0.14    | 1.18(0.68)           | 0.08    |
| No treatment, SABA to ICS/LABA | -0.005(0.19)         | 0.97    | 0.01(0.19)           | 0.95    | -0.13(0.21)          | 0.54    | -0.04(0.24)          | 0.86    | 0.08(0.23)           | 0.73    |
| Treated or not treated to OCS  | -0.26(0.56)          | 0.64    | -0.38(0.57)          | 0.50    | -0.94(0.62)          | 0.13    | -0.18(0.71)          | 0.79    | 0.68(0.68)           | 0.32    |
| Step down ICS/LTRA             | -0.06(0.23)          | 0.78    | -0.04(0.24)          | 0.88    | -0.07(0.26)          | 0.79    | -0.02(0.29)          | 0.95    | -0.21(0.28)          | 0.45    |
| Stop OCS                       | -0.57(0.25)          | 0.02    | -0.51(0.25)          | 0.04    | -0.90(0.27)          | <0.001  | -0.72(0.31)          | 0.02    | -0.18(0.29)          | 0.54    |

**S1.19 Effect of FEV1/FVC pre on AQLQ and its dimensions**

| Parameters                    | Global AQLQ          |         | AQLQ Symptom         |         | AQLQ Activity        |         | AQLQ Emotional       |         | AQLQ Environmental   |         |
|-------------------------------|----------------------|---------|----------------------|---------|----------------------|---------|----------------------|---------|----------------------|---------|
|                               | Estimate (std.error) | P-value | Estimate (std.error) | P-value | Estimate (std.error) | P-value | Estimate (std.error) | P-value | Estimate (std.error) | P-value |
| FEV1/FVC pre                  | <b>0.02(0.005)</b>   | <0.0001 | <b>0.02(0.005)</b>   | <0.0001 | <b>0.02(0.006)</b>   | <0.001  | <b>0.03(0.007)</b>   | <0.001  | 0.007(0.006)         | 0.23    |
| Time                          | 0.48(0.07)           | <0.0001 | 0.64(0.08)           | <0.0001 | 0.47(0.09)           | <0.001  | 0.57(0.09)           | <0.001  | 0.12(0.08)           | 0.15    |
| No change                     | Reference            |         |                      |         |                      |         |                      |         |                      |         |
| No treatment to SABA          | 0.98(0.57)           | 0.08    | 0.83(0.57)           | 0.15    | 0.74(0.65)           | 0.25    | 1.19(0.72)           | 0.09    | 1.32(0.69)           | 0.06    |
| No treatment, SABAtOICS       | -0.06(0.19)          | 0.73    | -0.04(0.19)          | 0.84    | -0.21(0.22)          | 0.33    | -0.09(0.24)          | 0.68    | 0.03(0.23)           | 0.88    |
| Treated or not treated to OCS | -0.05(0.57)          | 0.92    | -0.18(0.58)          | 0.75    | -0.72(0.65)          | 0.27    | 0.10(0.72)           | 0.88    | 0.75(0.69)           | 0.2     |
| Step down ICS/LTRA            | 0.02(0.24)           | 0.93    | 0.03(0.24)           | 0.89    | 0.03(0.27)           | 0.89    | 0.08(0.29)           | 0.79    | -0.17(0.29)          | 0.55    |
| Stop OCS                      | -0.67(0.25)          | 0.006   | -0.58(0.25)          | 0.01    | -1.07(0.28)          | <0.001  | -0.80(0.31)          | 0.01    | -0.26(0.30)          | 0.39    |

**S1.20 Effect of FEV1/FVC post on AQLQ and its dimensions**

| Parameters                    | Global AQLQ          |         | AQLQ Symptom         |         | AQLQ Activity        |         | AQLQ Emotional       |         | AQLQ Environmental   |         |
|-------------------------------|----------------------|---------|----------------------|---------|----------------------|---------|----------------------|---------|----------------------|---------|
|                               | Estimate (std.error) | P-value | Estimate (std.error) | P-value | Estimate (std.error) | P-value | Estimate (std.error) | P-value | Estimate (std.error) | P-value |
| FEV1/FVC post                 | <b>0.02(0.005)</b>   | <0.0001 | <b>0.02(0.006)</b>   | <0.0001 | <b>0.03(0.006)</b>   | <0.001  | <b>0.03(0.007)</b>   | <0.001  | 0.007(0.006)         | 0.22    |
| Time                          | 0.49(0.07)           | <0.0001 | 0.65(0.08)           | <0.0001 | 0.47(0.08)           | <0.001  | 0.56(0.09)           | <0.0001 | 0.12(0.08)           | 0.13    |
| No change                     | Reference            |         |                      |         |                      |         |                      |         |                      |         |
| No treatment to SABA          | 1.02(0.57)           | 0.07    | 0.86(0.57)           | 0.13    | 0.77(0.64)           | 0.22    | 1.24(0.71)           | 0.08    | 1.33(0.69)           | 0.06    |
| No treatment, SABAtOICS       | -0.06(0.19)          | 0.76    | -0.03(0.19)          | 0.87    | -0.19(0.21)          | 0.36    | -0.08(0.24)          | 0.72    | 0.03(0.23)           | 0.088   |
| Treated or not treated to OCS | -0.04(0.57)          | 0.94    | -0.18(0.57)          | 0.74    | -0.67(0.65)          | 0.29    | 0.11(0.72)           | 0.87    | 0.75(0.69)           | 0.28    |
| Step down ICS/LTRA            | 0.02(0.24)           | 0.94    | 0.03(0.23)           | 0.91    | 0.04(0.26)           | 0.88    | 0.07(0.29)           | 0.79    | -0.17(0.29)          | 0.54    |
| Stop OCS                      | -0.65(0.25)          | 0.009   | -0.56(0.25)          | 0.02    | -1.02(0.28)          | 0.0002  | -0.77(0.31)          | 0.01    | -0.27(0.30)          | 0.37    |

**S1.21 Effect of CRP (mg/L) on AQLQ and its dimensions**

| Parameters                    | Global AQLQ          |         | AQLQ Symptom         |         | AQLQ Activity        |         | AQLQ Emotional       |         | AQLQ Environmental   |         |
|-------------------------------|----------------------|---------|----------------------|---------|----------------------|---------|----------------------|---------|----------------------|---------|
|                               | Estimate (std.error) | P-value | Estimate (std.error) | P-value | Estimate (std.error) | P-value | Estimate (std.error) | P-value | Estimate (std.error) | P-value |
| CRP (MG/L)                    | 0.001(0.004)         | 0.77    | -0.001(0.004)        | 0.95    | -0.0003(0.005)       | 0.51    | 0.002(0.005)         | 0.64    | 0.006(0.005)         | 0.25    |
| Time                          | 0.57(0.07)           | <0.0001 | 0.73(0.09)           | <0.0001 | 0.56(0.09)           | <0.0001 | 0.67(0.10)           | <0.0001 | 0.19(0.09)           | 0.03    |
| No change                     | Reference            |         |                      |         |                      |         |                      |         |                      |         |
| No treatment to SABA          | 1.04(0.58)           | 0.07    | 0.88(0.57)           | 0.12    | 0.76(0.65)           | 0.24    | 1.26(0.73)           | 0.08    | 1.33(0.7)            | 0.06    |
| No treatment to ICS           | -0.06(0.19)          | 0.75    | -0.03(0.19)          | 0.86    | -0.22(0.22)          | 0.31    | -0.11(0.25)          | 0.67    | 0.04(0.24)           | 0.86    |
| Treated or not treated to OCS | -0.04(0.64)          | 0.94    | -0.29(0.63)          | 0.64    | -0.65(0.72)          | 0.37    | 0.02(0.81)           | 0.97    | 1.01(0.77)           | 0.19    |
| Step down ICS/LTRA            | -0.05(0.25)          | 0.84    | -0.03(0.24)          | 0.89    | -0.04(0.28)          | 0.89    | 0.02(0.31)           | 0.94    | -0.27(0.29)          | 0.36    |
| Stop OCS                      | -0.77(0.25)          | 0.002   | -0.70(0.26)          | 0.006   | -1.18(0.29)          | <0.0001 | -0.93(0.33)          | 0.005   | -0.33(0.31)          | 0.28    |

**Supplementary Table 2 (S2). Univariate binary logistic mixed model on binary AQLQ and its dimensions based on independent variables individually, with time and treatment changes group as fixed effect.**

**S2.1 Effect of ACT on binary AQLQ and its dimensions**

| Parameters                    | Global AQLQ  |         | AQLQ Symptom |         | AQLQ Activity |         | AQLQ Emotional |         | AQLQ Environmental |         |
|-------------------------------|--------------|---------|--------------|---------|---------------|---------|----------------|---------|--------------------|---------|
|                               | Odds ratio   | P-value | Odds ratio   | P-value | Odds ratio    | P-value | Odds ratio     | P-value | Odds ratio         | P-value |
| ACT                           | <b>1.789</b> | <0.0001 | <b>1.618</b> | <0.0001 | <b>1.499</b>  | <0.0001 | <b>1.489</b>   | <0.0001 | <b>1.266</b>       | <0.0001 |
| Time                          | 1.115        | 0.756   | 1.845        | 0.064   | 0.683         | 0.179   | 0.876          | 0.647   | 0.598              | 0.040   |
| No change                     | Reference    |         |              |         |               |         |                |         |                    |         |
| No treatment to SABA          | 3.066        | 0.246   | 1.580        | 0.62    | 0.984         | 0.986   | 3.663          | 0.250   | 7.196              | 0.071   |
| No treatment, SABAtOICS/LABA  | 0.581        | 0.186   | 0.920        | 0.829   | 1.374         | 0.361   | 0.634          | 0.281   | 1.187              | 0.635   |
| Treated or not treated to OCS | 1.548        | 0.752   | 0.369        | 0.487   | 1.402         | 0.788   | 2.351          | 0.550   | 3.667              | 0.250   |
| Step down ICS/LTRA            | 0.493        | 0.164   | 0.638        | 0.355   | 1.352         | 0.483   | 1.054          | 0.918   | 0.718              | 0.472   |
| Stop OCS                      | 0.375        | 0.167   | 0.921        | 0.896   | 0.857         | 0.788   | 0.949          | 0.932   | 0.882              | 0.811   |

**S2.2 Effect of age on binary AQLQ and its dimensions**

| Parameters                    | Global AQLQ |         | AQLQ Symptom |         | AQLQ Activity |         | AQLQ Emotional |         | AQLQ Environmental |         |
|-------------------------------|-------------|---------|--------------|---------|---------------|---------|----------------|---------|--------------------|---------|
|                               | Odds ratio  | P-value | Odds ratio   | P-value | Odds ratio    | P-value | Odds ratio     | P-value | Odds ratio         | P-value |
| Age (Year)                    | 1.019       | 0.525   | 1.015        | 0.164   | 0.996         | 0.704   | 1.006          | 0.567   | <b>1.028</b>       | 0.013   |
| Time                          | 206.19      | <0.0001 | 5.569        | <0.0001 | 2.420         | 0.0004  | 2.816          | <0.0001 | 1.281              | 0.280   |
| No change                     | Reference   |         |              |         |               |         |                |         |                    |         |
| No treatment to SABA          | 2.592       | 0.749   | 2.064        | 0.523   | 1.955         | 0.556   | 7.715          | 0.121   | 11.252             | 0.061   |
| No treatment, SABAtoICS/LABA  | 0.690       | 0.722   | 0.901        | 0.799   | 1.232         | 0.596   | 0.667          | 0.370   | 1.214              | 0.641   |
| Treated or not treated to OCS | 1.316       | 0.928   | 0.383        | .49     | 0.955         | 0.969   | 0.898          | 0.936   | 1.711              | 0.669   |
| Step down ICS/LTRA            | 0.825       | 0.882   | 0.857        | 0.767   | 1.346         | 0.544   | 1.226          | 0.714   | 0.871              | 0.794   |
| Stop OCS                      | 0.229       | 0.393   | 0.323        | 0.065   | 0.301         | 0.043   | 0.267          | 0.035   | 0.367              | 0.085   |

**S2.3 Effect of sex on binary AQLQ and its dimensions**

| Parameters                    | Global AQLQ |         | AQLQ Symptom |         | AQLQ Activity |         | AQLQ Emotional |         | AQLQ Environmental |         |
|-------------------------------|-------------|---------|--------------|---------|---------------|---------|----------------|---------|--------------------|---------|
|                               | Odds ratio  | P-value | Odds ratio   | P-value | Odds ratio    | P-value | Odds ratio     | P-value | Odds ratio         | P-value |
| Sex                           | 0.453       | 0.367   | 0.698        | 0.288   | <b>0.326</b>  | <0.0001 | <b>0.418</b>   | 0.018   | <b>0.380</b>       | 0.006   |
| Time                          | 205.16      | <0.0001 | 5.653        | <0.0001 | 2.431         | <0.0001 | 2.841          | <0.0001 | 1.326              | 0.219   |
| No change                     | Reference   |         |              |         |               |         |                |         |                    |         |
| No treatment to SABA          | 4.344       | 0.619   | 2.632        | 0.394   | 2.114         | 0.506   | 9.568          | 0.084   | 19.049             | 0.024   |
| No treatment, SABAtoICS/LABA  | 0.651       | 0.682   | 0.878        | 0.751   | 1.167         | 0.688   | 0.639          | 0.317   | 1.144              | 0.745   |
| Treated or not treated to OCS | 1.288       | 0.934   | 0.412        | 0.524   | 0.856         | 0.894   | 0.882          | 0.925   | 1.879              | 0.612   |
| Step down ICS/LTRA            | 0.915       | 0.946   | 0.843        | 0.742   | 1.531         | 0.376   | 1.299          | 0.634   | 0.882              | 0.812   |
| Stop OCS                      | 0.198       | 0.356   | 0.301        | 0.053   | 0.225         | 0.014   | 0.219          | 0.017   | 0.301              | 0.042   |

**S2.4 Effect of BMI on binary AQLQ and its dimensions**

| Parameters                    | Global AQLQ  |         | AQLQ Symptom |         | AQLQ Activity |         | AQLQ Emotional |         | AQLQ Environmental |         |
|-------------------------------|--------------|---------|--------------|---------|---------------|---------|----------------|---------|--------------------|---------|
|                               | Odds ratio   | P-value | Odds ratio   | P-value | Odds ratio    | P-value | Odds ratio     | P-value | Odds ratio         | P-value |
| BMI (kg/m <sup>2</sup> )      | <b>0.879</b> | 0.007   | 0.958        | 0.228   | <b>0.889</b>  | 0.0007  | 0.968          | 0.399   | 0.949              | 0.136   |
| Time                          | 5.464        | <0.0001 | 5.676        | <0.0001 | 2.431         | 0.0004  | 2.851          | <0.0001 | 1.326              | 0.219   |
| No change                     | Reference    |         |              |         |               |         |                |         |                    |         |
| No treatment to SABA          | 5.959        | 0.213   | 2.593        | 0.398   | 1.988         | 0.528   | 8.581          | 0.102   | 16.799             | 0.031   |
| No treatment, SABAtoICS/LABA  | 0.668        | 0.417   | 0.918        | 0.843   | 1.356         | 0.429   | 0.683          | 0.399   | 1.241              | 0.606   |
| Treated or not treated to OCS | 1.394        | 0.816   | 0.443        | 0.558   | 1.081         | 0.946   | 0.979          | 0.988   | 2.103              | 0.550   |
| Step down ICS/LTRA            | 0.673        | 0.522   | 0.792        | 0.654   | 1.288         | 0.594   | 1.187          | 0.757   | 0.767              | 0.618   |
| Stop OCS                      | 0.206        | 0.039   | 0.354        | 0.091   | 0.366         | 0.087   | 0.281          | 0.045   | 0.416              | 0.133   |

**S2.5 Effect of smoking status on binary AQLQ and its dimensions**

| Parameters                    | Global AQLQ |         | AQLQ Symptom |         | AQLQ Activity |         | AQLQ Emotional |         | AQLQ Environmental |         |
|-------------------------------|-------------|---------|--------------|---------|---------------|---------|----------------|---------|--------------------|---------|
|                               | Odds ratio  | P-value | Odds ratio   | P-value | Odds ratio    | P-value | Odds ratio     | P-value | Odds ratio         | P-value |
| Non-smokers                   | Reference   |         |              |         |               |         |                |         |                    |         |
| Ex-Smokers                    | 1.471       | 0.647   | 1.168        | 0.645   | 0.979         | 0.951   | 1.024          | 0.948   | <b>2.233</b>       | 0.023   |
| Current Smokers               | 0.145       | 0.373   | 0.348        | 0.063   | 0.871         | 0.761   | 0.666          | 0.433   | <b>3.483</b>       | 0.009   |
| Time                          | 246.18      | <0.001  | 5.548        | <0.0001 | 2.387         | 0.0005  | 2.796          | <0.001  | 1.365              | 0.178   |
| No change                     | Reference   |         |              |         |               |         |                |         |                    |         |
| No treatment to SABA          | 4.961       | 0.633   | 2.546        | 0.404   | 1.851         | 0.589   | 8.556          | 0.103   | 11.248             | 0.061   |
| No treatment, SABAtICS/LABA   | 0.702       | 0.742   | 0.926        | 0.851   | 1.236         | 0.591   | 0.667          | 0.371   | 1.107              | 0.805   |
| Treated or not treated to OCS | 1.625       | 0.882   | 0.439        | 0.554   | 0.924         | 0.947   | 0.935          | 0.961   | 1.677              | 0.671   |
| Step down ICS/LTRA            | 0.783       | 0.855   | 0.804        | 0.669   | 1.337         | 0.553   | 1.161          | 0.787   | 0.828              | 0.717   |
| Stop OCS                      | 0.244       | 0.430   | 0.346        | 0.082   | 0.306         | 0.047   | 0.275          | 0.041   | 0.331              | 0.056   |

**S2.6 Effect of atopy  
on binary AQLQ and  
its dimensions**

| Parameters                    | Global AQLQ |         | AQLQ Symptom |         | AQLQ Activity |         | AQLQ Emotional |         | AQLQ Environmental |         |
|-------------------------------|-------------|---------|--------------|---------|---------------|---------|----------------|---------|--------------------|---------|
|                               | Odds ratio  | P-value | Odds ratio   | P-value | Odds ratio    | P-value | Odds ratio     | P-value | Odds ratio         | P-value |
| Atopy                         | 2.341       | 0.372   | 2.039        | 0.482   | <b>2.256</b>  | 0.046   | 1.168          | 0.681   | 0.567              | 0.121   |
| Time                          | 142.51      | <0.0001 | 976.77       | <0.0001 | 2.416         | 0.002   | 2.668          | 0.0005  | 1.232              | 0.406   |
| No change                     | Reference   |         |              |         |               |         |                |         |                    |         |
| No treatment to SABA          | 8.736       | 0.475   | 5.315        | 0.601   | 2.901         | 0.447   | 13.595         | 0.061   | 18.797             | 0.036   |
| No treatment, SABAtOICS/LABA  | 1.151       | 0.905   | 1.615        | 0.715   | 1.446         | 0.462   | 1.004          | 0.994   | 1.574              | 0.337   |
| Treated or not treated to OCS | 2.319       | 0.788   | 8.146        | 0.960   | 0.955         | 0.974   | 1.331          | 0.838   | 2.636              | 0.467   |
| Step down ICS/LTRA            | 1.231       | 0.887   | 1.555        | 0.784   | 1.074         | 0.909   | 1.310          | 0.662   | 0.788              | 0.695   |
| Stop OCS                      | 0.351       | 0.591   | 0.621        | 0.810   | 0.222         | 0.052   | 0.282          | 0.729   | 0.259              | 0.051   |

**S2.7 Effect of onset of asthma on binary AQLQ and its dimensions**

| Parameters                    | Global AQLQ |         | AQLQ Symptom |         | AQLQ Activity |         | AQLQ Emotional |         | AQLQ Environmental |         |
|-------------------------------|-------------|---------|--------------|---------|---------------|---------|----------------|---------|--------------------|---------|
|                               | Odds ratio  | P-value | Odds ratio   | P-value | Odds ratio    | P-value | Odds ratio     | P-value | Odds ratio         | P-value |
| Onset of asthma               | 1.013       | 0.677   | 0.976        |         | 1.002         | 0.909   |                |         | <b>1.023</b>       | 0.004   |
| Time                          | 14.305      | 0.006   | 39.409       |         | 3.333         | 0.034   |                |         | 1.122              | 0.689   |
| No change                     | Reference   |         |              |         |               |         |                |         |                    |         |
| No treatment to SABA          | 16889.1     | 0.0001  | 333.3        |         | 1368.38       | 0.566   |                |         | 15.138             | 0.068   |
| No treatment, SABAtOICS/LABA  | 0.651       | 0.783   | 2.009        |         | 0.737         | 0.765   |                |         | 0.959              | 0.918   |
| Treated or not treated to OCS | 0.00001     | 0.999   | 0.00003      |         | 0.0001        | 0.989   |                |         | 0.701              | 0.805   |
| Step down ICS/LTRA            | 0.921       | 0.964   | 0.883        |         | 0.949         | 0.971   |                |         | 0.946              | 0.912   |
| Stop OCS                      | 0.214       | 0.675   | 0.000001     |         | 0.256         | 0.523   |                |         | 0.389              | 0.150   |

**S2.8 Effect of FeNO on binary AQLQ and its dimensions**

| Parameters                    | Global AQLQ |         | AQLQ Symptom |         | AQLQ Activity |         | AQLQ Emotional |         | AQLQ Environmental |         |
|-------------------------------|-------------|---------|--------------|---------|---------------|---------|----------------|---------|--------------------|---------|
|                               | Odds ratio  | P-value | Odds ratio   | P-value | Odds ratio    | P-value | Odds ratio     | P-value | Odds ratio         | P-value |
| FENO (ppb)                    | 0.991       | 0.362   | 1.001        | 0.765   | <b>1.007</b>  | 0.031   | 1.001          | 0.823   | 1.002              | 0.558   |
| Time                          | 349.57      | <0.0001 | 5.752        | <0.0001 | 2.794         | <0.0001 | 2.931          | <0.0001 | 1.404              | 0.147   |
| No change                     | Reference   |         |              |         |               |         |                |         |                    |         |
| No treatment to SABA          | 2.702       | 0.737   | 2.449        | 0.419   | 1.952         | 0.548   | 7.741          | 0.107   | 15.684             | 0.033   |
| No treatment, SABAtoICS/LABA  | 0.741       | 0.786   | 0.876        | 0.745   | 1.151         | 0.721   | 0.662          | 0.348   | 1.161              | 0.721   |
| Treated or not treated to OCS | 1.179       | 0.958   | 0.406        | 0.514   | 0.935         | 0.954   | 0.911          | 0.943   | 1.924              | 0.598   |
| Step down ICS/LTRA            | 0.748       | 0.836   | 0.783        | 0.634   | 1.192         | 0.717   | 1.104          | 0.8552  | 0.731              | 0.551   |
| Stop OCS                      | 0.254       | 0.452   | 0.313        | 0.057   | 0.259         | 0.025   | 0.264          | 0.030   | 0.362              | 0.081   |

**S2.9 Effect of sputum neutrophils on binary AQLQ and its dimensions**

| Parameters                              | Global AQLQ |         | AQLQ Symptom |         | AQLQ Activity |         | AQLQ Emotional |         | AQLQ Environmental |         |
|-----------------------------------------|-------------|---------|--------------|---------|---------------|---------|----------------|---------|--------------------|---------|
|                                         | Odds ratio  | P-value | Odds ratio   | P-value | Odds ratio    | P-value | Odds ratio     | P-value | Odds ratio         | P-value |
| Sputum neutrophils (10 <sup>3</sup> /g) | 1.034       | 0.056   | 1.001        | 0.969   | 0.994         | 0.342   | <b>1.013</b>   | 0.042   | 0.999              | 0.934   |
| Time                                    | 218.95      | <0.0001 | 5.835        | <0.0001 | 2.787         | 0.0004  | 2.638          | 0.0008  | 1.425              | 0.191   |
| No change                               | Reference   |         |              |         |               |         |                |         |                    |         |
| No treatment to SABA                    | 167.56      | 0.363   | 5.717        | 0.209   | 3.377         | 0.343   | 16.009         | 0.068   | 19.775             | 0.063   |
| No treatment ICS/LABA                   | 0.476       | 0.578   | 0.747        | 0.552   | 0.917         | 0.842   | 0.793          | 0.607   | 1.032              | 0.945   |
| Treated or not treated to OCS           | 0.846       | 0.961   | 0.342        | 0.475   | 0.773         | 0.833   | 0.898          | 0.932   | 2.038              | 0.586   |
| Step down ICS/LTRA                      | 0.485       | 0.662   | 0.458        | 0.231   | 1.087         | 0.745   | 1.242          | 0.691   | 0.661              | 0.473   |
| Stop OCS                                | 0.136       | 0.401   | 0.310        | 0.119   | 0.198         | 0.022   | 0.342          | 0.096   | 0.299              | 0.073   |

**S2.10 Effect of sputum neutrophils on binary AQLQ and its dimensions**

| Parameters                              | Global AQLQ  |         | AQLQ Symptom |         | AQLQ Activity |         | AQLQ Emotional |         | AQLQ Environmental |         |
|-----------------------------------------|--------------|---------|--------------|---------|---------------|---------|----------------|---------|--------------------|---------|
|                                         | Odds ratio   | P-value | Odds ratio   | P-value | Odds ratio    | P-value | Odds ratio     | P-value | Odds ratio         | P-value |
| Sputum eosinophils (10 <sup>3</sup> /g) | <b>0.926</b> | 0.026   | <b>0.905</b> | 0.008   | 0.987         | 0.136   | <b>0.971</b>   | 0.003   | 0.985              | 0.082   |
| Time                                    | 77.57        | <0.0001 | 242.18       | <0.001  | 2.502         | 0.002   | 2.392          | 0.002   | 1.292              | 0.345   |
| No change                               | Reference    |         |              |         |               |         |                |         |                    |         |
| No treatment to SABA                    | 128.49       | 0.379   | 11.351       | 0.747   | 2.827         | 0.425   | 13.863         | 0.078   | 17.225             | 0.075   |
| No treatment, SABA to ICS/LABA          | 0.599        | 0.690   | 0.876        | 0.921   | 1.009         | 0.982   | 0.826          | 0.669   | 1.105              | 0.831   |
| Treated or not treated to OCS           | 1.448        | 0.921   | 0.391        | 0.834   | 0.764         | 0.829   | 1.041          | 0.974   | 2.121              | 0.571   |
| Step down ICS/LTRA                      | 0.463        | 0.624   | 0.361        | 0.561   | 1.067         | 0.904   | 1.135          | 0.814   | 0.628              | 0.426   |
| Stop OCS                                | 0.196        | 0.461   | 0.421        | 0.667   | 0.210         | 0.024   | 0.364          | 0.114   | 0.308              | 0.081   |

**S2.11 Effect of blood neutrophils on binary AQLQ and its dimensions**

| Parameters                    | Global AQLQ |         | AQLQ Symptom |         | AQLQ Activity |         | AQLQ Emotional |         | AQLQ Environmental |         |
|-------------------------------|-------------|---------|--------------|---------|---------------|---------|----------------|---------|--------------------|---------|
|                               | Odds ratio  | P-value | Odds ratio   | P-value | Odds ratio    | P-value | Odds ratio     | P-value | Odds ratio         | P-value |
| Blood neutrophils (µL)        | 0.992       | 0.823   | 1.011        | 0.555   | 0.978         | 0.144   | 1.001          | 0.936   | 1.027              | 0.068   |
| Time                          | 174.59      | <0.001  | 6.383        | <0.0001 | 2.622         | 0.0002  | 2.895          | <0.0001 | 1.325              | 0.228   |
| No change                     | Reference   |         |              |         |               |         |                |         |                    |         |
| No treatment to SABA          | 3.271       | 0.688   | 2.565        | 0.439   | 1.831         | 0.601   | 8.716          | 0.112   | 16.186             | 0.034   |
| No treatment to ICS/LABA      | 0.687       | 0.717   | 0.851        | 0.715   | 1.151         | 0.728   | 0.623          | 0.317   | 1.197              | 0.667   |
| Treated or not treated to OCS | 1.399       | 0.912   | 0.337        | 0.466   | 1.128         | 0.921   | 0.889          | 0.934   | 1.502              | 0.745   |
| Step down ICS/LTRA            | 0.765       | 0.839   | 0.731        | 0.578   | 1.371         | 0.531   | 1.126          | 0.838   | 0.713              | 0.525   |
| Stop OCS                      | 0.237       | 0.399   | 0.306        | 0.070   | 0.288         | 0.041   | 0.262          | 0.04    | 0.366              | 0.085   |

**S2.12 Effect of blood eosinophils on binary AQLQ and its dimensions**

| Parameters                    | Global AQLQ  |         | AQLQ Symptom |         | AQLQ Activity |         | AQLQ Emotional |         | AQLQ Environmental |         |
|-------------------------------|--------------|---------|--------------|---------|---------------|---------|----------------|---------|--------------------|---------|
|                               | Odds ratio   | P-value | Odds ratio   | P-value | Odds ratio    | P-value | Odds ratio     | P-value | Odds ratio         | P-value |
| Blood eosinophils (µL)        | <b>0.717</b> | 0.007   | <b>0.776</b> | 0.009   | 0.923         | 0.075   | <b>0.840</b>   | 0.003   | 0.971              | 0.433   |
| Time                          | 80.725       | <0.0001 | 6.755        | 0.0002  | 2.441         | 0.0006  | 2.723          | <0.001  | 1.321              | 0.238   |
| No change                     | Reference    |         |              |         |               |         |                |         |                    |         |
| No treatment to SABA          | 3.214        | 0.716   | 2.635        | 0.496   | 1.756         | 0.626   | 9.077          | 0.133   | 16.364             | 0.035   |
| No treatment to ICS/LABA      | 0.692        | 0.735   | 0.941        | 0.904   | 1.253         | 0.588   | 0.667          | 0.423   | 1.174              | 0.709   |
| Treated or not treated to OCS | 0.696        | 0.905   | 0.255        | 0.417   | 0.861         | 0.905   | 0.802          | 0.883   | 1.945              | 0.603   |
| Step down ICS/LTRA            | 0.501        | 0.611   | 0.631        | 0.486   | 1.311         | 0.601   | 1.037          | 0.951   | 0.725              | 0.555   |
| Stop OCS                      | 0.211        | 0.349   | 0.281        | 0.101   | 0.294         | 0.048   | 0.251          | 0.046   | 0.375              | 0.098   |

**S2.13**  
**Effect of**  
**total IgE**  
**on binary**  
**AQLQ**  
**and its**  
**dimensions**

| Parameters           | Global AQLQ |         | AQLQ Symptom |         | AQLQ Activity |         | AQLQ Emotional |         | AQLQ Environmental |         |
|----------------------|-------------|---------|--------------|---------|---------------|---------|----------------|---------|--------------------|---------|
|                      | Odds ratio  | P-value | Odds ratio   | P-value | Odds ratio    | P-value | Odds ratio     | P-value | Odds ratio         | P-value |
| Total IgE (KU/L)     | 1.001       | 0.396   | 1.001        | 0.344   | 1.001         | 0.375   | 1.001          | 0.529   | 0.999              | 0.729   |
| Time                 | 38.483      | <0.001  | 6.426        | <0.0001 | 2.445         | 0.001   | 2.551          | 0.0007  | 1.363              | 0.238   |
| No change            | Reference   |         |              |         |               |         |                |         |                    |         |
| No treatment to SABA | 4.986       | 0.605   | 3.401        | 0.327   | 2.042         | 0.551   | 8.596          | 0.097   | 22.021             | 0.41    |
| No treatment to ICS  | 0.811       | 0.846   | 1.071        | 0.888   | 1.342         | 0.511   | 0.724          | 0.493   | 1.194              | 0.723   |
| Treated to OCS       | 1.502       | 0.886   | 0.498        | 0.640   | 0.996         | 0.998   | 1.016          | 0.991   | 2.122              | 0.598   |
| Step down ICS/LTRA   | 0.703       | 0.802   | 0.709        | 0.594   | 1.151         | 0.802   | 1.044          | 0.91    | 0.875              | 0.831   |
| Stop OCS             | 0.346       | 0.521   | 0.426        | 0.234   | 0.375         | 0.135   | 0.342          | 0.101   | 0.274              | 0.067   |

**S2.14 Effect of fibrinogen on binary AQLQ and its dimensions**

| Parameters                     | Global AQLQ |         | AQLQ Symptom |         | AQLQ Activity |         | AQLQ Emotional |         | AQLQ Environmental |         |
|--------------------------------|-------------|---------|--------------|---------|---------------|---------|----------------|---------|--------------------|---------|
|                                | Odds ratio  | P-value | Odds ratio   | P-value | Odds ratio    | P-value | Odds ratio     | P-value | Odds ratio         | P-value |
| Fibrinogen (g/l)               | 0.491       | 0.158   | 0.756        | 0.201   | 0.668         | 0.051   | 1.019          | 0.926   | 1.217              | 0.276   |
| Time                           | 136.56      | <0.0001 | 6.508        | <0.0001 | 2.876         | 0.0001  | 2.991          | 0.0001  | 1.571              | 0.066   |
| No change                      | Reference   |         |              |         |               |         |                |         |                    |         |
| No treatment to SABA           | 2.720       | 0.746   | 2.894        | 0.364   | 1.505         | 0.734   | 9.057          | 0.105   | 13.093             | 0.041   |
| No treatment, SABA to ICS/LABA | 73.05       | 0.793   | 1.207        | 0.683   | 1.211         | 0.664   | 0.788          | 0.626   | 1.042              | 0.922   |
| Treated or not treated to OCS  | 1.547       | 0.901   | 0.654        | 0.771   | 1.072         | 0.956   | 1.229          | 0.883   | 2.056              | 0.559   |
| Step down ICS/LTRA             | 0.767       | 0.856   | 1.018        | 0.975   | 1.174         | 0.771   | 1.466          | 0.527   | 0.762              | 0.612   |
| Stop OCS                       | 0.214       | 0.447   | 0.327        | 0.111   | 0.228         | 0.030   | 0.251          | 0.043   | 0.215              | 0.015   |

**S2.15 Effect of FEV1 pre (%) on binary AQLQ and its dimensions**

| Parameters                    | Global AQLQ  |         | AQLQ Symptom |         | AQLQ Activity |         | AQLQ Emotional |         | AQLQ Environmental |         |
|-------------------------------|--------------|---------|--------------|---------|---------------|---------|----------------|---------|--------------------|---------|
|                               | Odds ratio   | P-value | Odds ratio   | P-value | Odds ratio    | P-value | Odds ratio     | P-value | Odds ratio         | P-value |
| FEV1 pre (%)                  | <b>1.081</b> | 0.003   | <b>1.027</b> | 0.003   | <b>1.046</b>  | <0.0001 | <b>1.035</b>   | <0.0001 | <b>1.031</b>       | 0.0001  |
| Time                          | 109.58       | <0.0001 | 5.802        | <0.001  | 2.288         | 0.002   | 2.681          | 0.0001  | 1.207              | 0.417   |
| No change                     | Reference    |         |              |         |               |         |                |         |                    |         |
| No treatment to SABA          | 2.813        | 0.736   | 1.913        | 0.588   | 1.108         | 0.928   | 5.448          | 0.194   | 10.986             | 0.061   |
| No treatment to ICS/LABA      | 0.681        | 0.745   | 0.933        | 0.874   | 1.357         | 0.451   | 0.703          | 0.435   | 1.306              | 0.522   |
| Treated or not treated to OCS | 7.235        | 0.566   | 0.464        | 0.614   | 1.284         | 0.844   | 1.246          | 0.875   | 2.878              | 0.411   |
| Step down ICS/LTRA            | 0.806        | 0.884   | 0.779        | 0.652   | 1.271         | 0.633   | 1.132          | 0.824   | 0.772              | 0.624   |
| Stop OCS                      | 0.369        | 0.594   | 0.405        | 0.162   | 0.396         | 0.135   | 0.346          | 0.092   | 0.504              | 0.237   |

**S2.16 Effect of FEV1 post (%) on binary AQLQ and its dimensions**

| Parameters                    | Global AQLQ  |         | AQLQ Symptom |         | AQLQ Activity |         | AQLQ Emotional |         | AQLQ Environmental |         |
|-------------------------------|--------------|---------|--------------|---------|---------------|---------|----------------|---------|--------------------|---------|
|                               | Odds ratio   | P-value | Odds ratio   | P-value | Odds ratio    | P-value | Odds ratio     | P-value | Odds ratio         | P-value |
| FEV1 post (%)                 | <b>1.051</b> | 0.023   | <b>1.023</b> | 0.009   | <b>1.042</b>  | <0.0001 | <b>1.029</b>   | 0.0006  | <b>1.028</b>       | 0.0004  |
| Time                          | 128.81       | <0.0001 | 5.983        | <0.0001 | 2.463         | <0.0001 | 2.858          | <0.0001 | 1.302              | 0.256   |
| No change                     | Reference    |         |              |         |               |         |                |         |                    |         |
| No treatment to SABA          | 3.393        | 0.678   | 1.973        | 0.568   | 1.113         | 0.926   | 5.902          | 0.177   | 11.618             | 0.058   |
| No treatment to ICS/LABA      | 0.793        | 0.832   | 0.942        | 0.890   | 1.367         | 0.439   | 0.713          | 0.455   | 1.348              | 0.4799  |
| Treated or not treated to OCS | 2.735        | 0.753   | 0.432        | 0.574   | 1.112         | 0.932   | 1.083          | 0.954   | 2.548              | 0.468   |
| Step down ICS/LTRA            | 0.874        | 0.921   | 0.796        | 0.677   | 1.314         | 0.586   | 1.176          | 0.771   | 0.794              | 0.665   |
| Stop OCS                      | 0.383        | 0.585   | 0.401        | 0.155   | 0.405         | 0.143   | 0.342          | 0.091   | 0.511              | 0.251   |

**S2.17 Effect of FVC pre (%) on binary AQLQ and its dimensions**

| Parameters                    | Global AQLQ  |         | AQLQ Symptom |         | AQLQ Activity |         | AQLQ Emotional |         | AQLQ Environmental |         |
|-------------------------------|--------------|---------|--------------|---------|---------------|---------|----------------|---------|--------------------|---------|
|                               | Odds ratio   | P-value | Odds ratio   | P-value | Odds ratio    | P-value | Odds ratio     | P-value | Odds ratio         | P-value |
| FVC pre (%)                   | <b>1.066</b> | 0.009   | <b>1.025</b> | 0.013   | <b>1.048</b>  | <0.0001 | <b>1.034</b>   | 0.0005  | <b>1.029</b>       | 0.0006  |
| Time                          | 165.95       | <0.0001 | 6.294        | <.0001  | 2.582         | <0.0001 | 2.972          | <0.0001 | 1.321              | 0.229   |
| No change                     | Reference    |         |              |         |               |         |                |         |                    |         |
| No treatment to SABA          | 5.653        | 0.561   | 2.115        | 0.538   | 1.243         | 0.849   | 6.794          | 0.151   | 13.344             | 0.046   |
| No treatment to ICS/LABA      | 0.848        | 0.883   | 0.953        | 0.912   | 1.458         | 0.344   | 0.727          | 0.484   | 1.349              | 0.473   |
| Treated or not treated to OCS | 3.853        | 0.674   | 0.416        | 0.559   | 1.074         | 0.953   | 1.038          | 0.978   | 2.361              | 0.497   |
| Step down ICS/LTRA            | 0.811        | 0.881   | 0.762        | 0.623   | 1.219         | 0.686   | 1.104          | 0.861   | 0.754              | 0.592   |
| Stop OCS                      | 0.428        | 0.638   | 0.386        | 0.143   | 0.431         | 0.164   | 0.338          | 0.088   | 0.501              | 0.232   |

**S2.18 Effect of FVC post (%) on binary AQLQ and its dimensions**

| Parameters                    | Global AQLQ |         | AQLQ Symptom |         | AQLQ Activity |         | AQLQ Emotional |         | AQLQ Environmental |         |
|-------------------------------|-------------|---------|--------------|---------|---------------|---------|----------------|---------|--------------------|---------|
|                               | Odds ratio  | P-value | Odds ratio   | P-value | Odds ratio    | P-value | Odds ratio     | P-value | Odds ratio         | P-value |
| FVC post (%)                  | 1.043       | 0.059   | <b>1.022</b> | 0.028   | <b>1.038</b>  | <0.0001 | <b>1.027</b>   | 0.005   | <b>1.028</b>       | 0.002   |
| Time                          | 1.794       | <0.0001 | 6.309        | <0.0001 | 2.574         | <0.001  | 3.036          | <0.0001 | 1.377              | 0.168   |
| No change                     | Reference   |         |              |         |               |         |                |         |                    |         |
| No treatment to SABA          | 4.606       | 0.604   | 2.0001       | 0.564   | 1.166         | 0.891   | 6.513          | 0.158   | 12.44              | 0.052   |
| No treatment to ICS/LABA      | 7.757       | 0.812   | 0.915        | 0.838   | 1.332         | 0.461   | 0.694          | 0.421   | 1.311              | 0.516   |
| Treated or not treated to OCS | 1.732       | 0.858   | 0.371        | 0.501   | 0.861         | 0.898   | 0.869          | 0.918   | 1.972              | 0.588   |
| Step down ICS/LTRA            | 7.743       | 0.848   | 0.753        | 0.605   | 1.232         | 0.663   | 1.115          | 0.845   | 0.754              | 0.591   |
| Stop OCS                      | 0.328       | 0.524   | 0.365        | 0.118   | 0.393         | 0.115   | 0.316          | 0.069   | 0.482              | 0.206   |

**S2.19 Effect of FEV1/FVC pre on binary AQLQ and its dimensions**

| Parameters                    | Global AQLQ |         | AQLQ Symptom |         | AQLQ Activity |         | AQLQ Emotional |         | AQLQ Environmental |         |
|-------------------------------|-------------|---------|--------------|---------|---------------|---------|----------------|---------|--------------------|---------|
|                               | Odds ratio  | P-value | Odds ratio   | P-value | Odds ratio    | P-value | Odds ratio     | P-value | Odds ratio         | P-value |
| FEV1/FVC pre                  | 1.081       | 0.059   | 1.021        | 0.165   | <b>1.035</b>  | 0.018   | <b>1.035</b>   | 0.031   | 1.021              | 0.142   |
| Time                          | 146.84      | <0.0001 | 5.511        | <0.0001 | 2.293         | 0.001   | 2.683          | 0.0001  | 1.267              | 0.305   |
| No change                     | Reference   |         |              |         |               |         |                |         |                    |         |
| No treatment to SABA          | 2.401       | 0.775   | 2.481        | 0.428   | 1.758         | 0.624   | 7.731          | 0.118   | 15.253             | 0.036   |
| No treatment, SABA to ICS     | 0.698       | 0.741   | 0.889        | 0.778   | 1.231         | 0.606   | 0.661          | 0.365   | 1.201              | 0.663   |
| Treated or not treated to OCS | 2.494       | 0.779   | 0.464        | 0.593   | 1.178         | 0.894   | 1.189          | 0.899   | 2.394              | 0.494   |
| Step down ICS/LTRA            | 0.981       | 0.989   | 0.829        | 0.723   | 1.424         | 0.481   | 1.255          | 0.686   | 0.818              | 0.706   |
| Stop OCS                      | 0.265       | 0.459   | 0.349        | 0.091   | 0.317         | 0.059   | 0.291          | 0.052   | 0.405              | 0.123   |

**S2.20 Effect of  
FEV1/FVC post on  
binary AQLQ and  
its dimensions**

| Parameters                    | Global AQLQ |         | AQLQ Symptom |         | AQLQ Activity |         | AQLQ Emotional |         | AQLQ Environmental |         |
|-------------------------------|-------------|---------|--------------|---------|---------------|---------|----------------|---------|--------------------|---------|
|                               | Odds ratio  | P-value | Odds ratio   | P-value | Odds ratio    | P-value | Odds ratio     | P-value | Odds ratio         | P-value |
| FEV1/FVC post                 | 1.048       | 0.194   | 1.016        | 0.281   | <b>1.042</b>  | 0.006   | <b>1.034</b>   | 0.031   | 1.015              | 0.282   |
| Time                          | 1.508       | <0.0001 | 5.567        | <0.0001 | 2.289         | 0.001   | 2.683          | 0.0001  | 1.288              | 0.269   |
| No change                     | Reference   |         |              |         |               |         |                |         |                    |         |
| No treatment to SABA          | 2.865       | 0.725   | 2.563        | 0.413   | 1.863         | 0.593   | 7.731          | 0.118   | 15.324             | 0.033   |
| No treatment, SABA to ICS     | 0.719       | 0.753   | 0.883        | 0.766   | 1.221         | 0.625   | 0.661          | 0.365   | 1.206              | 0.651   |
| Treated or not treated to OCS | 2.113       | 0.812   | 0.456        | 0.583   | 1.249         | 0.858   | 1.189          | 0.899   | 2.258              | 0.515   |
| Step down ICS/LTRA            | 0.936       | 0.960   | 0.824        | 0.715   | 1.426         | 0.484   | 1.256          | 0.686   | 0.812              | 0.693   |
| Stop OCS                      | 0.286       | 0.469   | 0.348        | 0.091   | 0.326         | 0.069   | 0.291          | 0.052   | 0.411              | 0.125   |

**S2.21 Effect of CRP (mg/L) on binary AQLQ and its dimensions**

| Parameters                    | Global AQLQ |         | AQLQ Symptom |         | AQLQ Activity |         | AQLQ Emotional |         | AQLQ Environmental |         |
|-------------------------------|-------------|---------|--------------|---------|---------------|---------|----------------|---------|--------------------|---------|
|                               | Odds ratio  | P-value | Odds ratio   | P-value | Odds ratio    | P-value | Odds ratio     | P-value | Odds ratio         | P-value |
| CRP (MG/L)                    | 1.006       | 0.645   | 1.006        | 0.631   | 0.996         | 0.768   | 1.004          | 0.767   | 1.021              | 0.079   |
| Time                          | 5.163       | 0.0001  | 5.868        | <0.0001 | 2.938         | <0.001  | 3.057          | <0.0001 | 1.688              | 0.035   |
| No change                     | Reference   |         |              |         |               |         |                |         |                    |         |
| No treatment to SABA          | 5.019       | 0.254   | 2.563        | 0.395   | 1.587         | 0.685   | 8.591          | 0.109   | 15.246             | 0.037   |
| No treatment to ICS           | 0.656       | 0.408   | 0.918        | 0.842   | 1.139         | 0.753   | 0.728          | 0.504   | 1.152              | 0.744   |
| Treated or not treated to OCS | 1.704       | 0.724   | 0.574        | 0.701   | 1.208         | 0.881   | 1.671          | 0.728   | 3.420              | 0.371   |
| Step down ICS/LTRA            | 0.660       | 0.510   | 0.825        | 0.718   | 1.147         | 0.756   | 1.259          | 0.692   | 0.596              | 0.346   |
| Stop OCS                      | 0.144       | 0.017   | 0.269        | 0.049   | 0.219         | 0.018   | 0.231          | 0.029   | 0.288              | 0.043   |
